# Supplementary material for: Mitigating Deficiencies in Evidence during Regulatory Assessments of Advanced Therapies: A Comparative Study with Other Biologicals
Source: PubMed Central journal article supplement — Mol Ther Methods Clin Dev. 2020 Jun 3;18:269–79. doi: 10.1016/j.omtm.2020.05.035 (PMC7327881; doi:10.1016/j.omtm.2020.05.035), 2020-06-03
Supplement: mmc1.pdf [file mmc1.pdf]

**OMTM, Volume 18**

**Supplemental Information**

**Mitigating Deficiencies in Evidence during  
Regulatory Assessments of Advanced Therapies:  
A Comparative Study with Other Biologicals**

**Magdi Elsallab, Christopher A. Bravery, Andreas Kurtz, and Mohamed Abou-El-Enein**

Table 1 List of ATMP submissions

| Commercial name    | INN                                                                                                                                                     | Type | Cell source | Vector type                         | Indication          | ICD 10 disease classification                                             | Developer        | SME | Initial evaluation | Type of MA | OD  | OD date     | Submission date | CHMP opinion date | Withdrawal date | E.C. decision date |
|--------------------|---------------------------------------------------------------------------------------------------------------------------------------------------------|------|-------------|-------------------------------------|---------------------|---------------------------------------------------------------------------|------------------|-----|--------------------|------------|-----|-------------|-----------------|-------------------|-----------------|--------------------|
| Chondro-Select [1] | Characterized viable autologous cartilage cells expanded <i>ex vivo</i> expressing specific marker proteins                                             | TEP  | Autologous  | NA                                  | Cartilage defects   | Diseases of the musculoskeletal system and connective tissue              | TiGenix N.V.     | yes | Authorized         | Full       | no  | NA          | 01.06 .2007     | 25.06 .2009       | NA              | 05.10 .2009        |
| MACI[2]            | Matrix-applied characterized autologous cultured chondrocytes                                                                                           | TEP  | Autologous  | NA                                  | Cartilage defects   | Diseases of the musculoskeletal system and connective tissue              | Genzyme Europe   | no  | Authorized         | Full       | no  | NA          | 01.09 .2011     | 24.04 .2013       | NA              | 27.06 .2013        |
| Provengé [3]       | Autologous peripheral blood mononuclear cells activated with prostatic acid phosphatase granulocyte-macrophage colony-stimulating factor (sipuleucel-T) | CTMP | Autologous  | NA                                  | Prostatic neoplasms | Malignant neoplasms except for lymphoid, hematopoietic and related tissue | Dendreon UK LTD  | yes | Authorized         | Full       | no  | NA          | 30.12 .2011     | 27.06 .2013       | NA              | 06.09 .2013        |
| Spherox[4]         | Spheroids of human autologous matrix-associated chondrocytes                                                                                            | TEP  | Autologous  | NA                                  | Cartilage defects   | Diseases of the musculoskeletal system and connective tissue              | CO.DON AG        | yes | Authorized         | Full       | no  | NA          | 03.12 .2012     | 15.05 .2017       | NA              | 10.07 .2017        |
| Imlygic [5]        | Talimogene laherparepvec                                                                                                                                | GTMP | NA          | herpes simplex virus type-1 (HSV-1) | Melanoma            | Malignant neoplasms except for lymphoid, hematopoietic and related tissue | Amgen            | no  | Authorized         | Full       | no  | NA          | 28.08 .2014     | 22.10 .2015       | NA              | 16.12 .2015        |
| Strimvelis [6]     | Autologous CD34+ enriched cell fraction that contains CD34+ cells transduced with retroviral vector that encodes for the human ADA cDNA sequence        | GTMP | Autologous  | Retroviral vector                   | ADA-SCID            | Diseases of the blood and blood-forming organs                            | Glaxo SmithKline | No  | Authorized         | Full       | yes | 26.08 .2005 | 01.05 .2015     | 01.04 .2016       | NA              | 26.05 .2016        |
| Alofisel [7]       | Darvadstrocel                                                                                                                                           | CTMP | Allogeneic  | NA                                  | Anal fistula        | Diseases of the digestive system                                          | TiGenix N.V.     | yes | Authorized         | Full       | yes | 08.10 .2009 | 02.03 .2016     | 14.12 .2017       | NA              | 23.03 .2018        |
| Kymriah [8]        | Tisagenlecleucel                                                                                                                                        | GTMP | Autologous  | Lentivirus                          | ALL DLBCL           | Malignant neoplasms primary of lymphoid, hematopoietic and related tissue | Novartis         | no  | Authorized         | Full       | yes | 26.04 .2014 | 02.11 .2017     | 28.06 .2018       | NA              | 22.08 .2018        |
| Yescarta [9]       | Axicabtagene ciloleucel                                                                                                                                 | GTMP | Autologous  | Retroviru s                         | DLBCL               | Malignant neoplasms of lymphoid hematopoietic and related tissue          | Kite Pharma      | yes | Authorized         | Full       | yes | 16.11 .2014 | 29.07 .2017     | 28.06 .2018       | NA              | 23.08 .2018        |

| Commercial name                          | INN                                                                                                                                                                                                                          | Type | Cell source | Vector type                          | Indication                  | ICD 10 disease classification                                             | Developer                        | SME | Initial evaluation | Type of MA                | OD  | OD date     | Submission date | CHMP opinion date | Withdrawal date | E.C. decision date |
|------------------------------------------|------------------------------------------------------------------------------------------------------------------------------------------------------------------------------------------------------------------------------|------|-------------|--------------------------------------|-----------------------------|---------------------------------------------------------------------------|----------------------------------|-----|--------------------|---------------------------|-----|-------------|-----------------|-------------------|-----------------|--------------------|
| Luxturna [10]                            | Voretigene neparovvec                                                                                                                                                                                                        | GTMP | NA          | Adeno-associated viral type 2 (AAV2) | retinal dystrophy           | Diseases of the eye and adnexa                                            | Spark Therapeutics               | yes | Authorized         | Full                      | yes | 02.04 .2012 | 29.07 .2017     | 20.09 .2018       | NA              | 22.11 .2018        |
| Holoclar[11]                             | Ex vivo expanded autologous human corneal epithelial cells containing stem cells                                                                                                                                             | TEP  | Autologous  | NA                                   | Limbal stem-cell deficiency | Diseases of the eye and adnexa                                            | Chiesi Farmaceutici              | no  | Authorized         | Conditional               | yes | 07.11 .2008 | 06.03 .2013     | 18.12 .2014       | NA              | 17.02 .2015        |
| Zalmoxis[12]                             | Allogeneic T cells genetically modified with a retroviral vector encoding for a truncated form of the human low-affinity nerve growth factor receptor (ΔLNGFR) and the herpes simplex I virus thymidine kinase (HSV-TK Mut2) | CTMP | Allogeneic  | Retroviruses                         | HSCT, blood cancer          | Malignant neoplasms primary of lymphoid, hematopoietic and related tissue | MolMed SpA                       | yes | Authorized         | Conditional               | yes | 20.10 .2003 | 05.03 .2014     | 23.06 .2016       | NA              | 18.08 .2016        |
| Zynteglo[13]                             | Autologous CD34+ cells encoding βA-T87Q-globin gene                                                                                                                                                                          | GTMP | Autologous  | Lentivirus                           | beta-thalassemia            | Diseases of the blood and blood-forming organs                            | bluebird bio                     | yes | Authorized         | Conditional               | yes | 24.01 .2013 | 21.08 .2018     | 28.03 .2019       | NA              | 29.05 .2019        |
| Glybera [14]                             | Alipogene tiparvovvec                                                                                                                                                                                                        | GTMP | NA          | Adeno-associated virus type 1 (AAV1) | LPL deficiency              | Endocrine nutritional and metabolic diseases                              | Amsterdam Molecular Therapeutics | yes | Authorized         | Exceptional circumstances | yes | 08.03 .2004 | 23.12 .2009     | 19.07 .2012       | NA              | 25.10 .2012        |
| Cerepro (2007) [15]                      | sitimagine ceradenovvec                                                                                                                                                                                                      | GTMP | NA          | adenovirus serotype 5 (Ad 5)         | high-grade glioma           | Malignant neoplasms except lymphoid, hematopoietic and related tissue     | Ark therapeutics                 | yes | Withdrawn          | NA                        | yes | 06.02 .2002 | 04.10 .2005     | 26.04 .2007       | 13.07 .2007     | NA                 |
| Advexin [16]                             | contusugene ladenovvec                                                                                                                                                                                                       | GTMP | NA          | adenovirus serotype 5 (Ad 5)         | Li-Fraumeni cancer          | Malignant neoplasms, except lymphoid hematopoietic and related tissue     | Gendux Molecular Limited         | yes | Withdrawn          | NA                        | yes | 23.10 .2006 | 06.09 .2007     | NA                | 17.12 .2008     | NA                 |
| Contusugene Ladenovvec Gendux (CLG) [17] | contusugene ladenovvec                                                                                                                                                                                                       | GTMP | NA          | adenovirus serotype 5 (Ad 5)         | squamous cell carcinoma     | Malignant neoplasms except for lymphoid, hematopoietic and related tissue | Gendux Molecular Limited         | yes | Withdrawn          | NA                        | no  | NA          | 02.07 .2008     | NA                | 12.06 .2009     | NA                 |
| Cerepro (2010) [18]                      | sitimagine ceradenovvec                                                                                                                                                                                                      | GTMP | NA          | adenovirus serotype 5 (Ad 5)         | high-grade glioma           | Malignant neoplasms except for lymphoid, hematopoietic and related tissue | Ark therapeutics                 | yes | Withdrawn          | NA                        | yes | 06.02 .2002 | 28.11 .2008     | 17.12 .2009       | 08.03 .2010     | NA                 |

| Commercial name             | INN                                                                                                                | Type | Cell source | Vector type | Indication                  | ICD 10 disease classification                                             | Developer           | SME | Initial evaluation | Type of MA | OD  | OD date     | Submission date | CHMP opinion date | Withdrawal date | E.C. decision date |
|-----------------------------|--------------------------------------------------------------------------------------------------------------------|------|-------------|-------------|-----------------------------|---------------------------------------------------------------------------|---------------------|-----|--------------------|------------|-----|-------------|-----------------|-------------------|-----------------|--------------------|
| Oranera [19]                | multilayered cell-sheet of autologous oral mucosal epithelial cells                                                | TEP  | Autologous  | NA          | Limbal stem-cell deficiency | Diseases of the eye and adnexa                                            | CellSeed Europe Ltd | yes | Withdrawn          | NA         | no  | NA          | 01.06 .2011     | NA                | 14.03 .2013     | NA                 |
| Raligize                    | axalimogene filolisbac                                                                                             | GTMP | NA          | NA          | cervical cancer             | Malignant neoplasms except for lymphoid, hematopoietic and related tissue | Advaxis Inc         | no  | Withdrawn          | NA         | no  | NA          | 13.02 .2018     | NA                | 10.07 .2018     | NA                 |
| Hyalograft C autograft [20] | characterized viable autologous chondrocytes expanded in vitro, seeded and cultured on a hyaluronan-based scaffold | TEP  | Autologous  | NA          | Cartilage defects           | Diseases of the musculoskeletal system and connective tissue              | Anika Therapeutics  | yes | Withdrawn          | NA         | no  | NA          | 28.02 .2012     | NA                | 14.01 .2013     | NA                 |
| Heparesc[21]                | Human heterologous liver cells                                                                                     | CTMP | Allogeneic  | NA          | urea cycle disorders        | Endocrine, nutritional and metabolic diseases                             | cytonet             | yes | Rejected           | NA         | yes | 14.09 .2007 | 05.12 .2013     | 22.10 .2015       | NA              | 21.12 .2015        |

SME: small and medium-sized enterprise; O.D.: orphan designation; MA: marketing authorization; CHMP: Committee for Medicinal Products for Human Use; E.C.: European Commission; GTMP: gene therapy medicinal product; TEP: tissue-engineered product; CTMP: cell therapy medicinal product; LPL: lipoprotein lipase, HSCT: hematopoietic stem cell transplantation, ALL: acute lymphoblastic leukemia; DLBCL: diffuse large B-cell lymphoma; ADA-SCID: adenosine deaminase deficiency - severe combined immune deficiency.

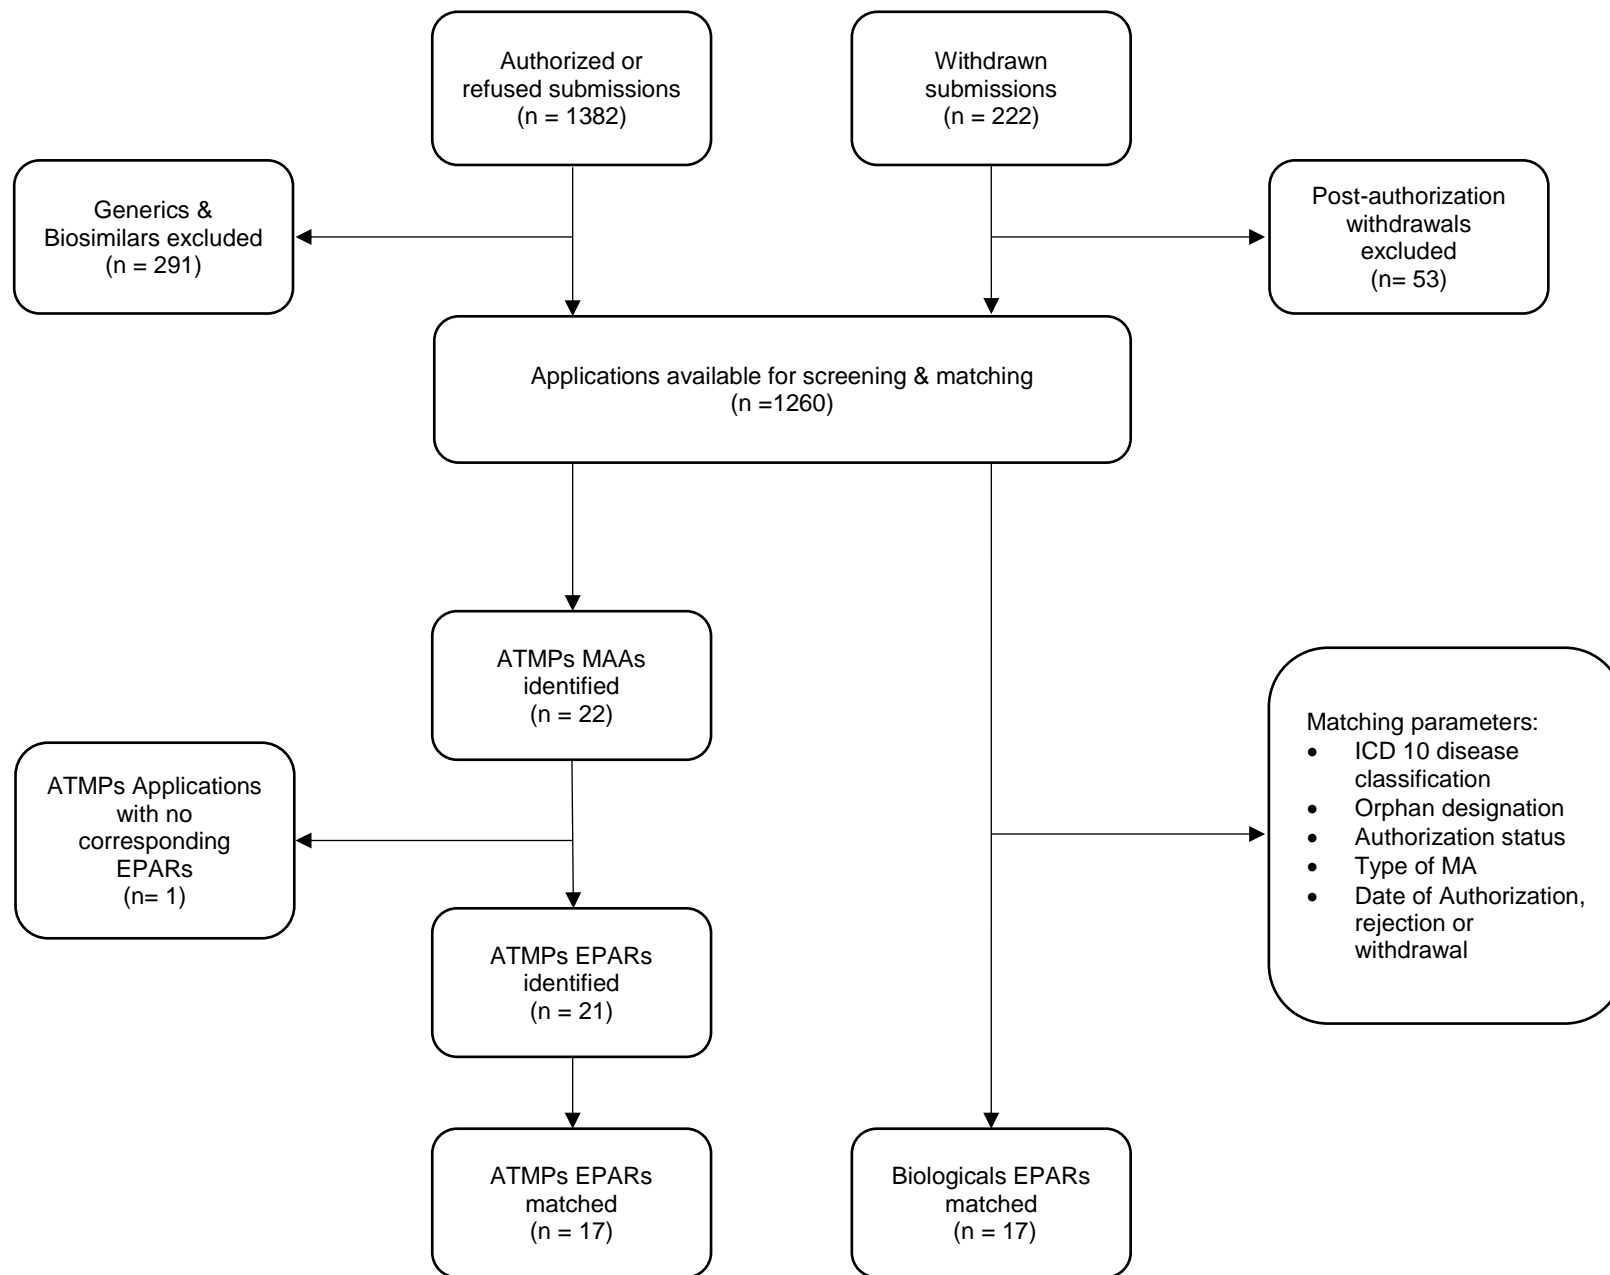

**Figure 1 flow chart of the screening of the EMA database, data retrieval and products matching.**

ATMPs: advanced therapy medicinal products, MAA: marketing authorization application, MA: marketing authorization, EPAR: European public assessment report, ICD: International Classification of Diseases.

Table 2 list of the matched Biological Medicinal Products

| Commercial name | INN                   | Type                                            | Indication                                                         | Developer                                        | SME | ICD 10 disease classification<br>Indication                               | Initial MA status | Type of MA                | OD  | OD date     | Submission date | CHMP opinion date | Withdrawal date | E.C. decision date | ATMP Match     |
|-----------------|-----------------------|-------------------------------------------------|--------------------------------------------------------------------|--------------------------------------------------|-----|---------------------------------------------------------------------------|-------------------|---------------------------|-----|-------------|-----------------|-------------------|-----------------|--------------------|----------------|
| Simponi [22]    | Golimumab             | monoclonal antibody                             | Rheumatoid arthritis, Psoriatic arthritis Axial, spondyloarthritis | Centocor B.V. currently (Janssen Biologics B.V.) | No  | Diseases of the musculoskeletal system and connective tissue              | Authorized        | Full                      | No  | NA          | 03.03 .2008     | 25.07 .2009       | NA              | 01.10 .2009        | Chondroelect   |
| Krystexxa [23]  | Pegloticase           | Recombinant Enzyme                              | Gouty arthritis                                                    | Savient Pharma                                   | No  | Diseases of the musculoskeletal system and connective tissue              | Authorized        | Full                      | No  | NA          | 03.05 .2011     | 18.10 .2012       | NA              | 08.01 .2013        | MACI           |
| Kadcyla [24]    | Trastuzumab emtansine | monoclonal antibody (antibody-drug conjugate)   | Advanced or metastatic breast cancer                               | Roche                                            | No  | Malignant neoplasms except for lymphoid, hematopoietic and related tissue | Authorized        | Full                      | No  | NA          | 30.08 .2012     | 19.09 .2013       | NA              | 15.11 .2013        | Provengé       |
| Kevzara [25]    | Sarilumab             | monoclonal antibody                             | Chronic idiopathic arthritis                                       | Sanofi-aventis group                             | No  | Diseases of the musculoskeletal system and connective tissue              | Authorized        | Full                      | No  | NA          | 24.06 .2016     | 21.04 .2017       | NA              | 23.06 .2017        | Spherox        |
| Portrazza[26]   | Necitumumab           | monoclonal antibody                             | Squamous non-small cell lung cancer                                | Eli Lilly Netherlands                            | No  | Malignant neoplasms except for lymphoid, hematopoietic and related tissue | Authorized        | Full                      | No  | NA          | 01.12 .2014     | 17.12 .2015       | NA              | 15.02 .2016        | Imlygic        |
| Alprolix [27]   | Eftrenonacog alfa     | Recombinant coagulation factor (fusion protein) | Hemophilia B                                                       | Biogen Idec Ltd                                  | No  | Diseases of the blood and blood-forming organs                            | Authorized        | Full                      | Yes | 08.06 .2007 | 04.06 .2015     | 25.02 .2016       | NA              | 12.05 .2016        | Strimvelis     |
| Revestive[28]   | Teduglutide           | Recombinant Hormone                             | Short bowel syndrome                                               | Nycomed Denmark                                  | No  | Diseases of the digestive system                                          | Authorized        | Full                      | Yes | 11.12 .2001 | 03.03 .2011     | 14.12 .2017       | NA              | 03.08 .2012        | Alofisel       |
| Besponsa [29]   | Inotuzumab ozogamicin | monoclonal antibody (antibody-drug conjugate)   | Precursor Cell Lymphoblastic Leukemia-Lymphoma                     | Pfizer Limited                                   | No  | Malignant neoplasms of lymphoid, hematopoietic and related tissue         | Authorized        | Full                      | Yes | 07.06 .2013 | 14.04 .2016     | 21.04 .2017       | NA              | 28.06 .2017        | Kymriah        |
| Mylotarg [30]   | Gemtuzumab ozogamicin | monoclonal antibody (antibody-drug conjugate)   | Acute myeloid leukemia                                             | Pfizer Limited                                   | No  | Malignant neoplasms of lymphoid, hematopoietic and related tissue         | Authorized        | Full                      | Yes | 18.10 .2000 | 01.12 .2016     | 22.02 .2018       | NA              | 19.04 .2018        | Yescarta       |
| Oxervate [31]   | Cenegermin            | Recombinant growth factor                       | Neurotrophic keratitis                                             | Dompé farmaceutici                               | No  | Diseases of the eye and adnexa                                            | Authorized        | Full                      | yes | NA          | 03.11 .2016     | 18.05 .2017       | NA              | 06.07 .2017        | Luxturna       |
| Adcetris [32]   | Brentuximab vedotin   | monoclonal antibody (antibody-drug conjugate)   | Hodgkin's lymphoma                                                 | Takeda Global Research                           | No  | Malignant neoplasms of lymphoid, hematopoietic and related tissue         | Authorized        | Conditional approval      | Yes | 15.01 .2009 | 31.05 .2011     | 19.07 .2012       | NA              | 25.10 .2012        | Zalmoxis       |
| Strensiq [33]   | Asfotase alfa         | Recombinant Enzyme (Fusion protein)             | Hypophosphatasia                                                   | Alexion Europe                                   | No  | Endocrine, nutritional and metabolic diseases                             | Authorized        | Exceptional circumstances | Yes | 03.12 .2008 | 01.07 .2014     | 25.06 .2015       | NA              | 28.08 .2015        | Glybera        |
| Theraloc [34]   | Nimotuzumab           | monoclonal antibody                             | High-grade glioma.                                                 | Oncoscience AG                                   | Yes | Malignant neoplasms except for lymphoid, hematopoietic and related tissue | Withdrawn         | NA                        | Yes | 02.09 .2004 | 04.10 .2007     | NA                | 01.12 .2008     |                    | Cerepro (2007) |

| Commercial name | INN                                   | Type                                             | Indication                              | Developer                       | SME | ICD 10 disease classification<br>Indication                               | Initial MA status | Type of MA | OD  | OD date     | Submission date | CHMP opinion date | Withdrawal date | E.C. decision date | ATMP Match              |
|-----------------|---------------------------------------|--------------------------------------------------|-----------------------------------------|---------------------------------|-----|---------------------------------------------------------------------------|-------------------|------------|-----|-------------|-----------------|-------------------|-----------------|--------------------|-------------------------|
| Oncophage [35]  | vitespen                              | Autologous Tumor-Derived Protein-Peptide Complex | Renal cell carcinoma                    | Antigenics Therapeutics Limited | No  | Malignant neoplasms except for lymphoid, hematopoietic and related tissue | Withdrawn         | NA         | Yes | 11.04 .2005 | 29.09 .2008     | NA                | 23.11 .2009     |                    | Advexin                 |
| Zafiride [36]   | Ngr-human tumor necrosis factor-alpha | Recombinant cytokine (Fusion protein)            | Advanced malignant pleural mesothelioma | Molmed                          | Yes | Malignant neoplasms except for lymphoid, hematopoietic and related tissue | Withdrawn         | NA         | Yes | 03.06 .2008 | 03.12 .2016     | NA                | 01.06 .2017     |                    | Cerepro (2010)          |
| Plivensia [37]  | Sirukumab                             | monoclonal antibody                              | Rheumatoid arthritis                    | Janssen-Cilag                   | No  | Diseases of the musculoskeletal system and connective tissue              | Withdrawn         | NA         | No  | NA          | 12.09 .2016     | NA                | 26.10 .2017     |                    | Hyalograf t C autograft |
| Ellelyso [38]   | Taliglucerase alfa                    | Recombinant Enzyme                               | Type 1 Gaucher disease                  | Pfizer Ltd                      | No  | Endocrine, nutritional and metabolic diseases                             | Rejected          | NA         | Yes | 23.03 .2010 | 25.11 .2010     | 03.07 .2012       | NA              | 25.10 .2012        | Heparesc                |

SME: small and medium-sized Enterprise, OD: orphan designation, MA: marketing authorization, CHMP: Committee for Medicinal Products for Human Use, EC: European Commission

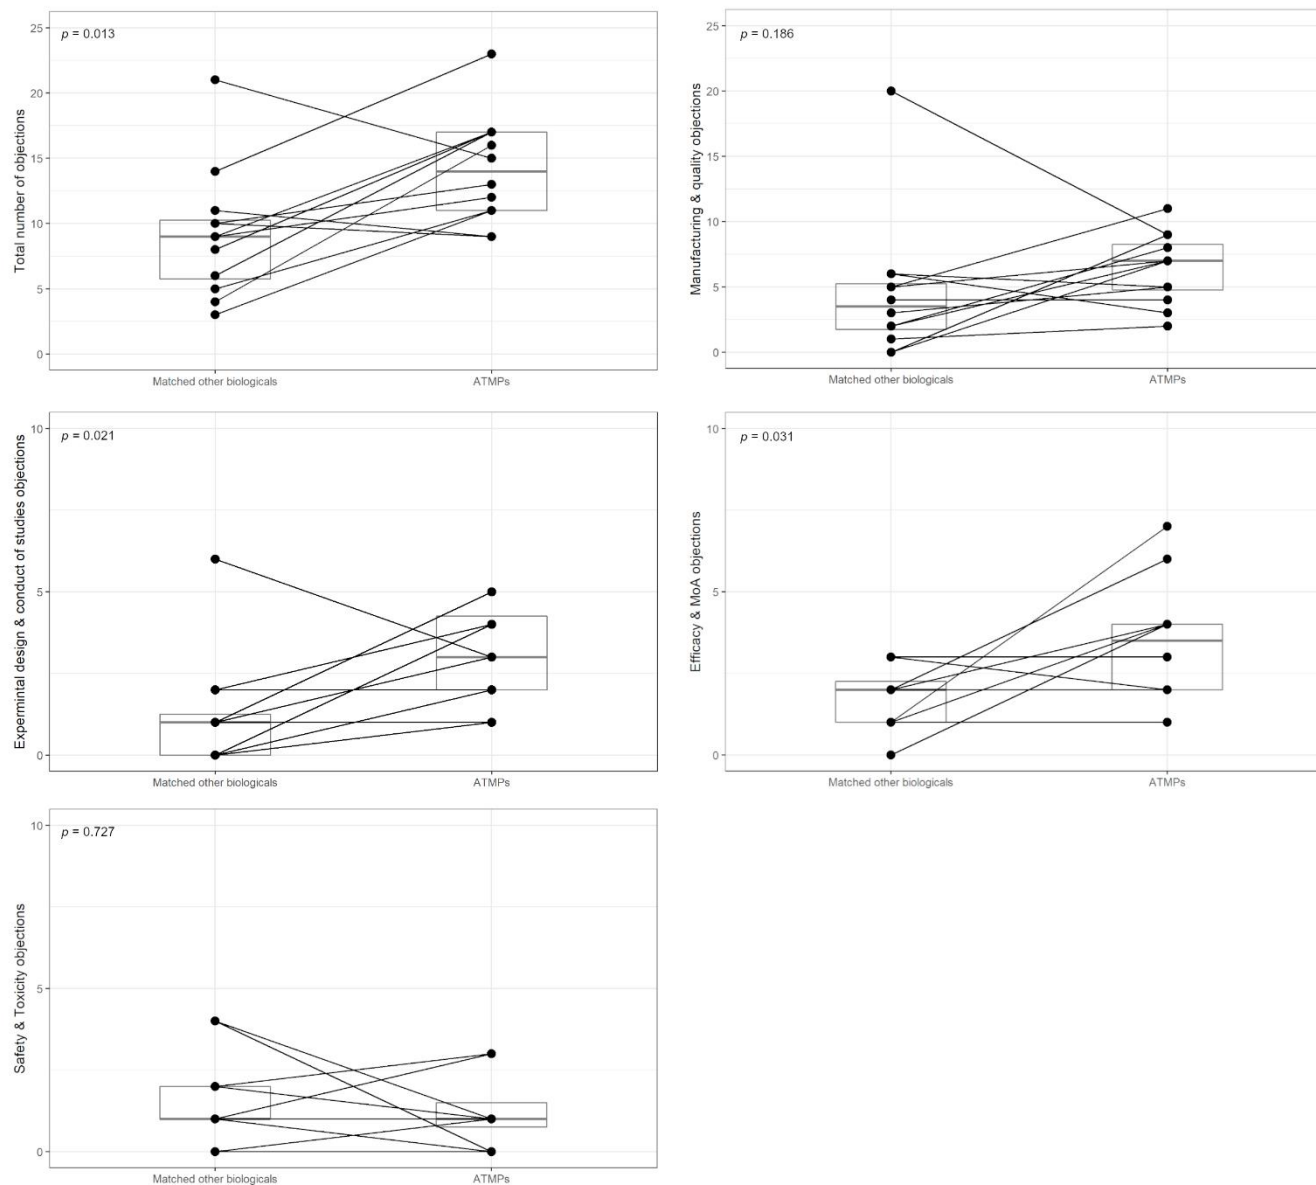

**Figure 2 Paired dot plots and boxplots of objections in matched authorized ATMPs and biologicals submissions.** ATMPs (authorized and failed) were matched to other biologicals via a matched-pair experimental design to compare the difference in the evaluation process between both. Regulatory objections were scored using quantitative assessment of the European public assessment reports (EPARs) of each product. The groups were compared statistically using two-tailed Wilcoxon signed-rank test. In the authorized cohorts ATMPs showed significantly higher differences in the total number of objections, the experimental design and conduct of the studies, and the efficacy and mode of Action (MoA) as depicted in the figure. Statistical test: Wilcoxon signed-rank test.



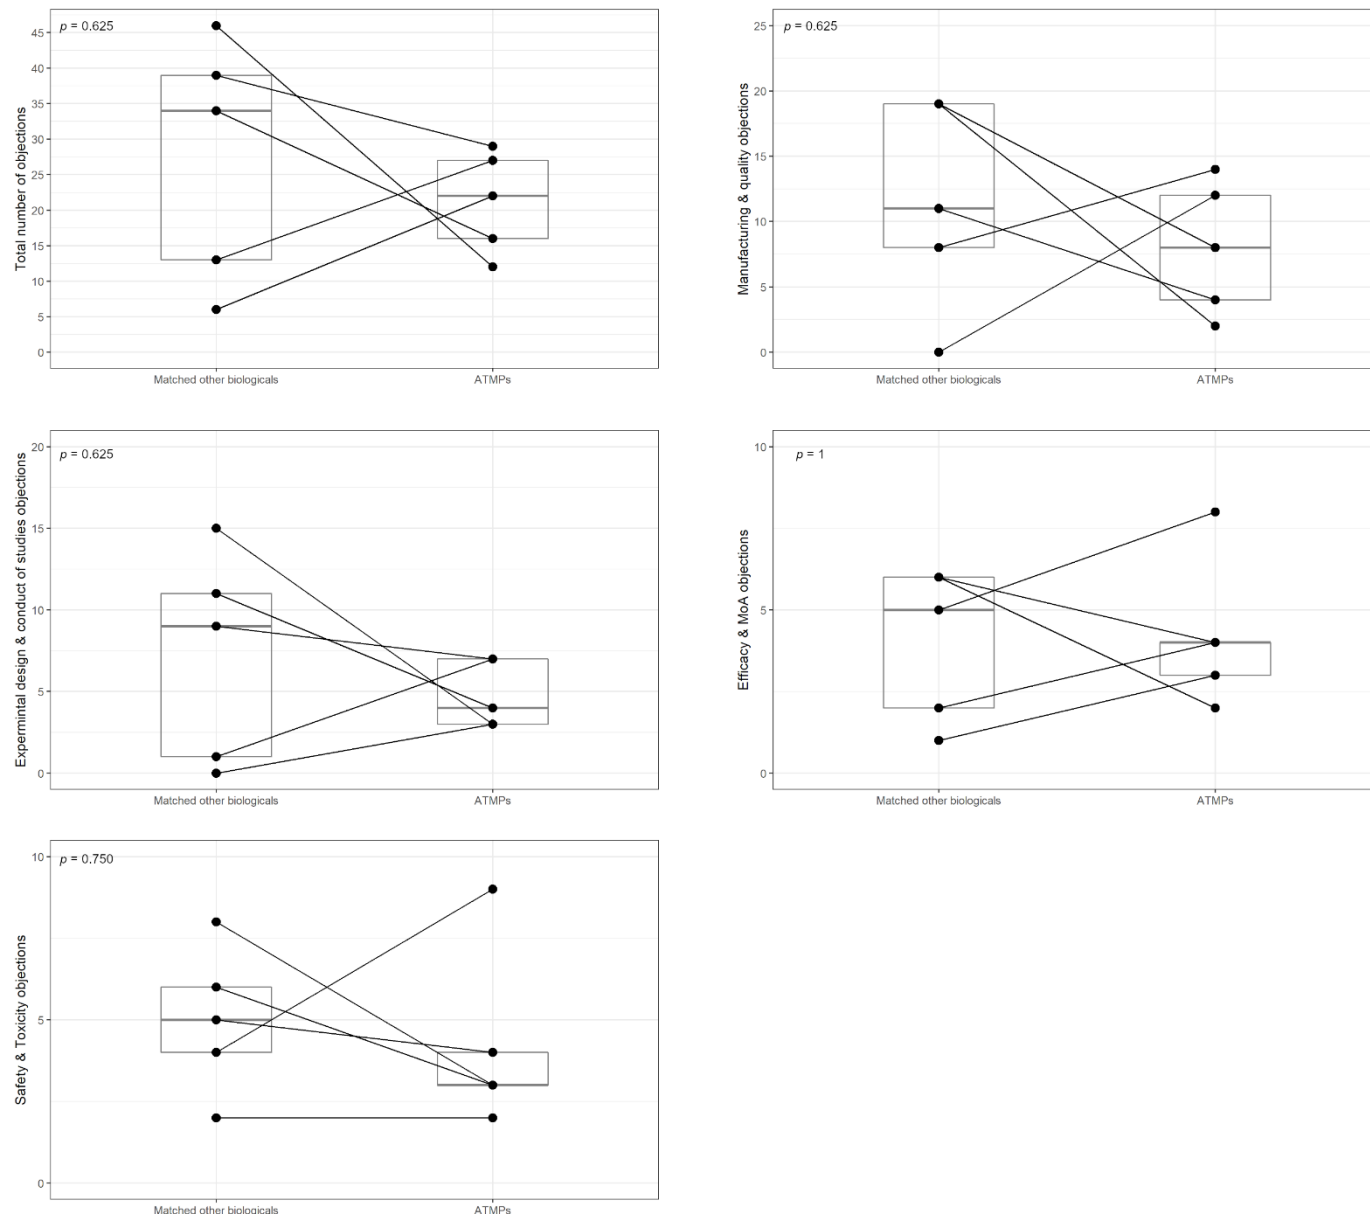

**Figure 3 Paired dot plots and boxplots of objections in matched failed ATMPs and biologicals submissions.** ATMPs (authorized and failed) were matched to other biologicals via a matched-pair experimental design to compare the difference in the evaluation process between both. Regulatory objections were scored using quantitative assessment of the European public assessment reports (EPARs) of each product. The groups were compared statistically using two-tailed Wilcoxon signed-rank test. In the failed cohorts no statistically significant difference were noted in any of the comparisons. Statistical test: Wilcoxon signed-rank test.

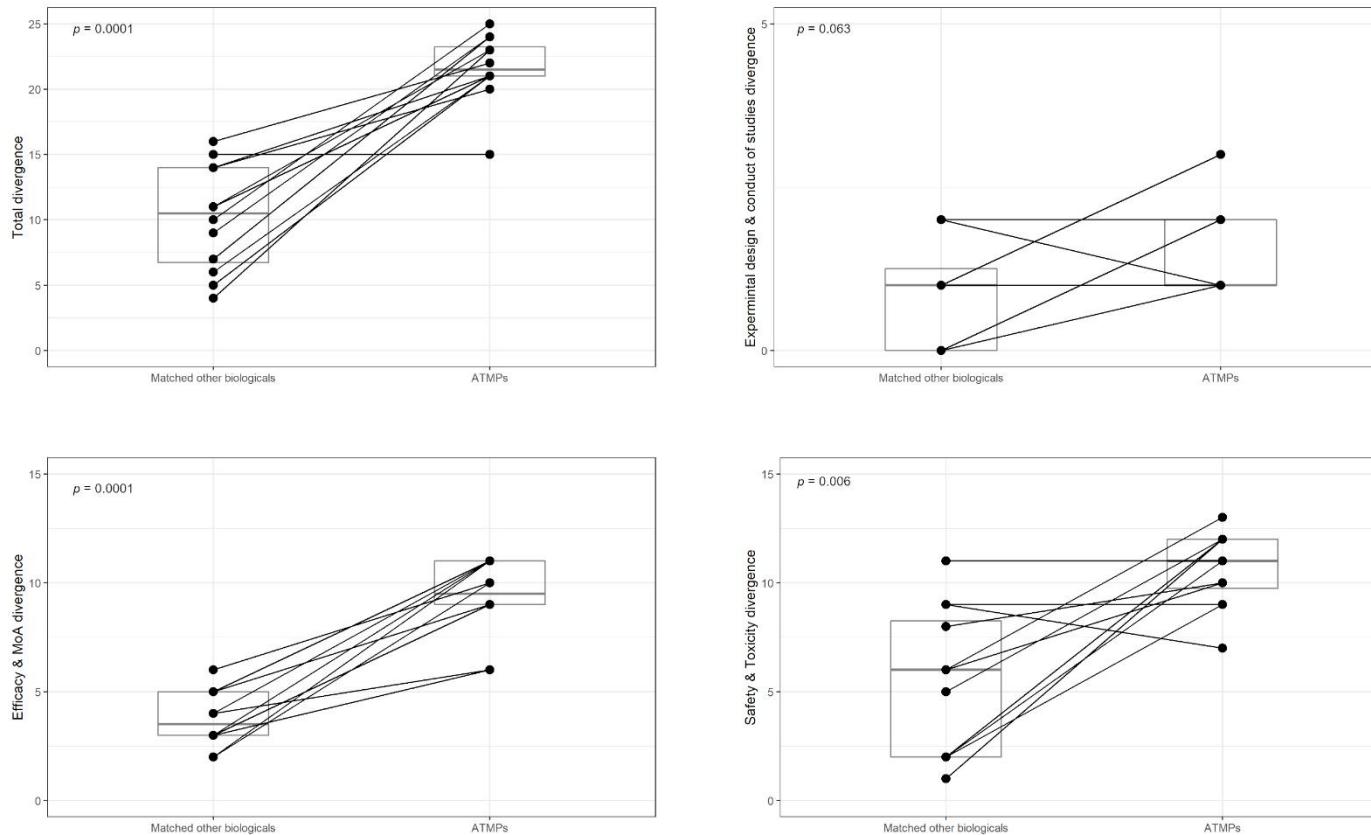

**Figure 4 Paired dot plots and boxplots of divergence in matched authorized ATMPs and biologicals submissions.** ATMPs (authorized and failed) were matched to other biologicals via a matched-pair experimental design to compare the difference in the evaluation process between both. Divergence from the regulatory requirements laid down in Annex I of Directive 2001/83/EC were measured using quantitative assessment of the omitted studies in the European public assessment reports (EPARs) of each product. The groups were compared statistically using two-tailed Wilcoxon signed-rank test. Significantly higher divergence were noted in the total numbers of divergence, the divergence in the efficacy and mode of action studies, as well as the divergence in safety and toxicity studies in the ATMPs cohort compared to the matched other biologicals. Statistical test: Wilcoxon signed-rank test.

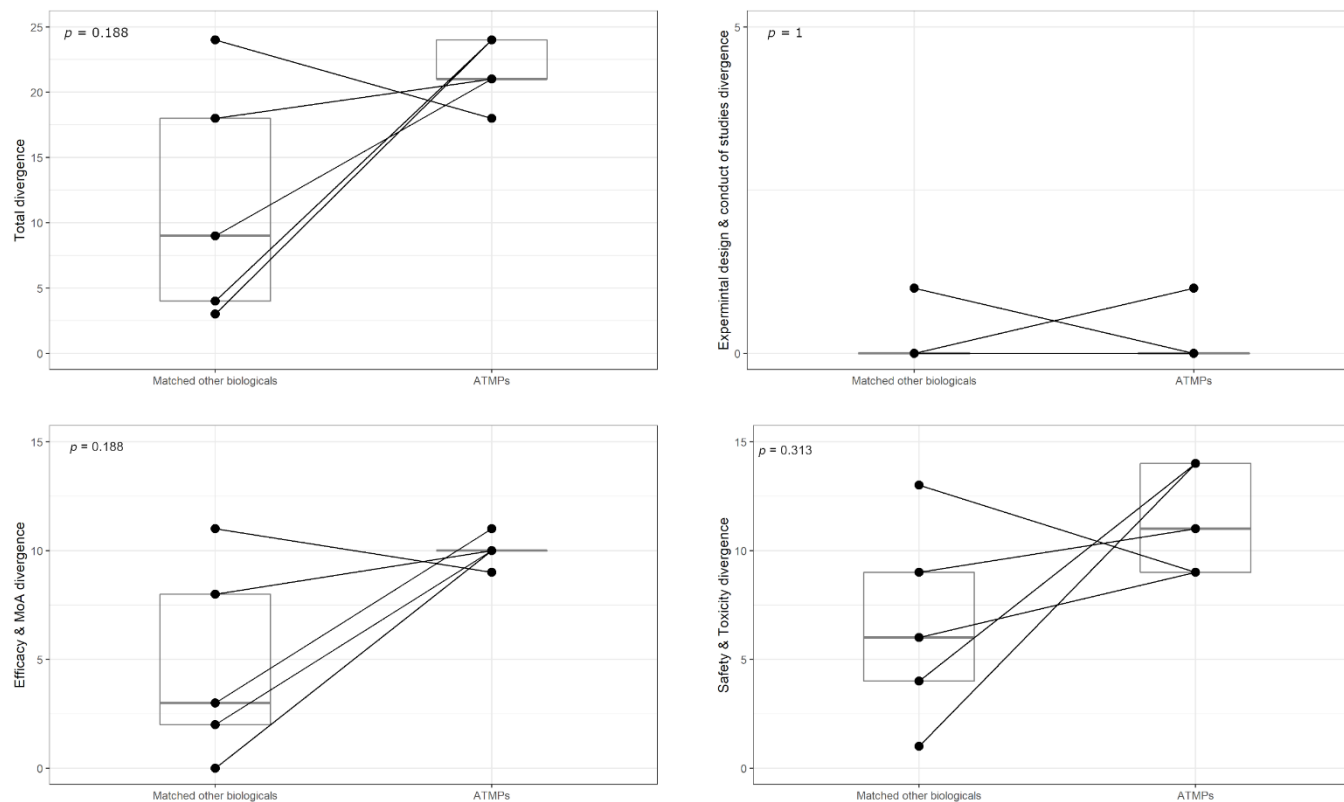

**Figure 5 Paired dot plots and boxplots of divergence in matched failed ATMPs and biologicals submissions.** ATMPs (authorized and failed) were matched to other biologicals via a matched-pair experimental design to compare the difference in the evaluation process between both. Divergence from the regulatory requirements laid down in Annex I of Directive 2001/83/EC were measured using quantitative assessment of the omitted studies in the European public assessment reports (EPARs) of each product. The groups were compared statistically using two-tailed Wilcoxon signed-rank test. No statistically significant differences were reported in the divergence in the total numbers or the divergence in any of the evidence domains. Statistical test: Wilcoxon signed-rank test.

Table 3 evidence domains, data requirements, and definitions.

| Evidence domains                                      | Data requirements                                                        | Definition                                                                                                                                                                                                                                                                                                       | reference                                                                                                                                                                                                                                                                                                                        |      |
|-------------------------------------------------------|--------------------------------------------------------------------------|------------------------------------------------------------------------------------------------------------------------------------------------------------------------------------------------------------------------------------------------------------------------------------------------------------------|----------------------------------------------------------------------------------------------------------------------------------------------------------------------------------------------------------------------------------------------------------------------------------------------------------------------------------|------|
| <b>Quality of manufactured product</b>                | <b>Good manufacturing practice (GMP) compliance</b>                      | Compliance to the set of guidelines that ensure that the produced active pharmaceutical ingredients are consistent high quality. The guidelines include rules for quality management, personnel, building and facility, process equipment, documentation, material mangment, production, packaging, and storage. | [39]                                                                                                                                                                                                                                                                                                                             |      |
|                                                       | <b>Control of materials (starting, raw, excipients)</b>                  | Materials used in production of the active pharmaceutical ingredients and the final products. The quality of each material should be confirmed by an appropriate set of test methods and acceptance criteria (specification).                                                                                    | [39]                                                                                                                                                                                                                                                                                                                             |      |
|                                                       | <b>Manufacturing process design &amp; control stratgey</b>               | Manufacturing process should be clearly defined and controlled. Control strategy is defined as the planned set of controls that are derived from the current product and the understanding of the manufacturing process that assures process performance and product quality.                                    | [39]                                                                                                                                                                                                                                                                                                                             |      |
|                                                       | <b>Manufacturing process validation</b>                                  | Evidence that the manufacturing process when operated within defined parameters, can produce an intermediate or active pharmaceutical ingrediet with consistent set of predifiened specifications and quality attributes.                                                                                        | [39]                                                                                                                                                                                                                                                                                                                             |      |
|                                                       | <b>Choice of Analytical methods (e.g., assays)</b>                       | Suitability of the analytical methods used for process control, release testing and stability.                                                                                                                                                                                                                   | [40]                                                                                                                                                                                                                                                                                                                             |      |
|                                                       | <b>Analytical methods validation</b>                                     | A documented program that provides a high degree of assurance that a specific process, method, or system will consistently produce a result meeting pre-determined acceptance criteria                                                                                                                           | [39,40]                                                                                                                                                                                                                                                                                                                          |      |
|                                                       | <b>Comparability</b>                                                     | The activities, including study design, conduct of studies, and evaluation of data, that are designed to investigate whether the products are comparable.                                                                                                                                                        | [41,42]                                                                                                                                                                                                                                                                                                                          |      |
|                                                       | <b>Stability testing</b>                                                 | Data on the stability of of the drug substance and drug product under different conditions that confirms the product remains within specifiction when stored or handled as intended.                                                                                                                             | [43]                                                                                                                                                                                                                                                                                                                             |      |
|                                                       | <b>Product characterization, specification &amp; acceptance criteria</b> | Determination of physicochemical properties, biological activity, purity and impurities by appropriate analytical methods. The outcome of such studies are used to identify relevant test methods. Acceptance criteria are established from batch data, process characterisation and other studies.              | [44]                                                                                                                                                                                                                                                                                                                             |      |
| <b>Experimental design and conduct of the studies</b> | <b>Non-clinical studies</b>                                              | <b>GLP compliance</b>                                                                                                                                                                                                                                                                                            | Compliance to the set of rules and criteria laid down in Directive 2004/9/EC and Directive 2004/10/EC. GLP is a quality system concerned with the organisational process and the conditions under which non-clinical health and environmental safety studies are planned, performed, monitored, recorded, reported and archived. | [45] |
|                                                       |                                                                          | <b>Animal models &amp; experiments</b>                                                                                                                                                                                                                                                                           | <i>In vivo</i> and/or <i>in vitro</i> studies designed to explore the pharmacology, PK/PD and biodistribution, toxicity and other desirable or undesirable biological effects. Such studies aim to mimic the human disease and intended route of administration, dose and dosing schedule intended for humans.                   | [46] |
|                                                       | <b>Clinical studies</b>                                                  | <b>GCP &amp; protocol compliance</b>                                                                                                                                                                                                                                                                             | Compliance to the princibles of good clinical practice that insure that the design, conduct, recording and repoting of the clinical studies are of high quality. Deviation from such principles should be assessed for its impact on the quality and the integrity of the clinical studies.                                      | [47] |

|                                      |                              |                                                                   |                                                                                                                                                                                                                                                                                                                                                                                                                                                                                                                               |                                                                                                                                                                                                         |
|--------------------------------------|------------------------------|-------------------------------------------------------------------|-------------------------------------------------------------------------------------------------------------------------------------------------------------------------------------------------------------------------------------------------------------------------------------------------------------------------------------------------------------------------------------------------------------------------------------------------------------------------------------------------------------------------------|---------------------------------------------------------------------------------------------------------------------------------------------------------------------------------------------------------|
|                                      |                              | <b>Clinical Study methodology</b>                                 | All the aspects related to the design of the main clinical study submitted for the marketing authorization. These aspects include the control arm of the trial, randomization, blinding, adequacy of the sample size and statistical methods.                                                                                                                                                                                                                                                                                 | [48]                                                                                                                                                                                                    |
|                                      |                              | <b>Study population</b>                                           | Data that show that the included population in the study is well-defined through clear inclusion and exclusion criteria which is crucial for assessing the target population and the intended indication.                                                                                                                                                                                                                                                                                                                     | [47]                                                                                                                                                                                                    |
|                                      |                              | <b>Choice of Endpoints</b>                                        | Study endpoints are the response variables that are chosen to assess drug effects that are related to pharmacokinetic parameters, pharmacodynamic measures, efficacy and safety. A primary endpoint(s) should reflect clinically relevant effects and is typically selected based on the principal objective of the study. Secondary endpoints assess other drug effects that may or may not be related to the primary endpoint. Endpoints and the plan for their analysis should be prospectively specified in the protocol. | [48]                                                                                                                                                                                                    |
| <b>Efficacy &amp; mode of action</b> | <b>Non-clinical evidence</b> | <b>Pharmacodynamics studies</b>                                   | Primary non-clinical PD studies should address the mode of action (MoA) related to intended therapeutic use and provide knowledge on the interaction of the investigational medicinal product with the intended target as well as with related targets.                                                                                                                                                                                                                                                                       | [49]                                                                                                                                                                                                    |
|                                      |                              | <b>Pharmacokinetics/Biodistribution studies (PK/BD)</b>           | Non-clinical part of the PK/BD that focus on the interaction of the investigation medicinal product with the target action site, hence influencing the efficacy of the product. This either include the traditional Pharmacokinetic studies (absorption, distribution) or other BD assessments such as distribution, persistence of the drug product.                                                                                                                                                                         |                                                                                                                                                                                                         |
|                                      | <b>Clinical evidence</b>     | <b>Primary Pharmacodynamics studies</b>                           | Studies on the mode of action and/or effects of a substance in relation to its desired therapeutic target are primary pharmacodynamic studies. Evidence that can provide early estimates of activity and potential efficacy and may guide the dose and dosing regimen in later studies.                                                                                                                                                                                                                                       | [48,50]                                                                                                                                                                                                 |
|                                      |                              | <b>Pharmacokinetics/Biodistribution (PK/BD)</b>                   | See nonclinical PK/BD                                                                                                                                                                                                                                                                                                                                                                                                                                                                                                         |                                                                                                                                                                                                         |
|                                      |                              | <b>Dose finding studies</b>                                       | A dose-finding study is a clinical trial that aims to outline the no-effect dose, the mean effective dose, and the maximal effective dose while taking tolerability into account to define an optimal dose.                                                                                                                                                                                                                                                                                                                   | [51]                                                                                                                                                                                                    |
|                                      |                              | <b>Clinical efficacy results</b>                                  | The degree to which a medicinal product produces a beneficial effects under ideal and controlled conditions. Usually obtained from the main study submitted in the marketing authorization application.                                                                                                                                                                                                                                                                                                                       | [52]                                                                                                                                                                                                    |
|                                      |                              | <b>Long-term clinical efficacy</b>                                | The long-term benefits of the medicinal product                                                                                                                                                                                                                                                                                                                                                                                                                                                                               |                                                                                                                                                                                                         |
|                                      |                              | <b>Indication</b>                                                 | The disease(s) or condition(s) and population(s) that a medicine is intended to treat.                                                                                                                                                                                                                                                                                                                                                                                                                                        | [53]                                                                                                                                                                                                    |
|                                      |                              | <b>Post-hoc analysis and meta-analysis and supportive studies</b> | Any studies or analyses other than that of the main study that are conducted and included in the marketing authorization application to support the claims of the efficacy. These studies include post-hoc analyses, meta-analyses across studies, and other supportive studies.                                                                                                                                                                                                                                              |                                                                                                                                                                                                         |
|                                      | <b>Safety &amp; Toxicity</b> | <b>Non-clinical evidence</b>                                      | <b>Non-clinical Toxicity studies</b>                                                                                                                                                                                                                                                                                                                                                                                                                                                                                          | Non-clinical studies that measure functional indices of potential toxicity in animal studies. This include general toxicity studies, genotoxicity, tumorigenicity, immunotoxicity, and local tolerance. |

|  |                             |                                               |                                                                                                                                                                                                                                                                                                                                                                                                                                                                                                                                                                                                                                                                                            |      |
|--|-----------------------------|-----------------------------------------------|--------------------------------------------------------------------------------------------------------------------------------------------------------------------------------------------------------------------------------------------------------------------------------------------------------------------------------------------------------------------------------------------------------------------------------------------------------------------------------------------------------------------------------------------------------------------------------------------------------------------------------------------------------------------------------------------|------|
|  |                             | <b>Pharmacokinetics/Biodistribution PK/BD</b> | Non-clinical Part of the PK/BD that focus on the interaction of the drug product with sites other than the target action site, hence influencing the safety of the product. This either include the traditional Pharmacokinetic studies (metabolism, and excretion) or other BD assessments such as mobilization, clearance, shedding, and off-target distribution of the biologically active substance.                                                                                                                                                                                                                                                                                   |      |
|  | <b>Clinical evidence</b>    | <b>Adverse events</b>                         | Any untoward medical occurrence in a patient or clinical trial subject administered a medicinal product and which does not necessarily have a causal relationship with this treatment.                                                                                                                                                                                                                                                                                                                                                                                                                                                                                                     | [48] |
|  |                             | <b>Long term safety data</b>                  | The long-term studies to identify any undesirable effects of the product                                                                                                                                                                                                                                                                                                                                                                                                                                                                                                                                                                                                                   |      |
|  |                             | <b>Secondary pharmacodynamics studies</b>     | Secondary pharmacodynamic studies (previously referred to as general pharmacology) can be defined as studies on the mode of action and/or effects of a substance not related to its desired therapeutic target.                                                                                                                                                                                                                                                                                                                                                                                                                                                                            | [50] |
|  |                             | <b>Pharmacokinetics/Biodistribution PK/BD</b> | see nonclinical PK/BD                                                                                                                                                                                                                                                                                                                                                                                                                                                                                                                                                                                                                                                                      |      |
|  | <b>Risk-management plan</b> |                                               | Risk management plans include: (1) the identification or characterisation of the safety profile of the medicinal product, with emphasis on important identified and important potential risks and missing information, and also on which safety concerns need to be managed proactively or further studied (the 'safety specification'); 2. the planning of pharmacovigilance activities to characterise and quantify clinically relevant risks, and to identify new adverse reactions (the 'pharmacovigilance plan'); 3. the planning and implementation of risk minimisation measures, including the evaluation of the effectiveness of these activities (the 'risk minimisation plan'). | [54] |

## References

- [1] Committee for Medicinal Products for Human Use (CHMP). European Public Assessment Report (EPAR). ChondroCelect. EMEA/724428/2009. 2009.
- [2] Committee for Medicinal Products for Human Use (CHMP). European public assessment report (EPAR). MACI. EMA/25287/2013. 2013.
- [3] Committee for Medicinal Products for Human Use (CHMP). European public assessment report (EPAR): Provenge. EMA/440011/2013. 2013.
- [4] Committee for Medicinal Products for Human Use (CHMP). European Public Assessment Report (EPAR): Spherox. EMA/349863/2017 2017.
- [5] Committee for Medicinal Products for Human Use (CHMP). European public assessment report (EPAR): Imlygic. EMA/734400/2015/ corr. 1. 2015.
- [6] Committee for Medicinal Products for Human Use (CHMP). European Public Assessment Report (EPAR): Strimvelis. EMA/CHMP/272303/2016Rev 1. 2016.
- [7] Committee for Medicinal Products for Human Use (CHMP). European Public Assessment Report (EPAR): Alofisel. EMA/CHMP/64055/2018. 2017.
- [8] Committee for Medicinal Products for Human Use (CHMP). European Public Assessment Report (EPAR) Kymriah. EMA/485563/2018. 2018.
- [9] Committee for Medicinal Products for Human Use (CHMP). European Public Assessment Report (EPAR): Yescarta. EMA/481168/2018 2018.
- [10] Committee for Medicinal Products for Human Use (CHMP). European Public Assessment Report (EPAR): Luxturna. EMA/CHMP/700911/2018. 2018.
- [11] Committee for Medicinal Products for Human Use (CHMP). European Public Assessment Report (EPAR): Holoclar. EMA/25273/2015 2014.
- [12] Committee for Medicinal Products for Human Use (CHMP). European Public Assessment Report (EPAR): Zalmoxis. EMA/CHMP/589978/2016 2016.
- [13] Committee for Medicinal Products for Human Use (CHMP). European public assessment report (EPAR): Zynteglo. EMA/56140/2020/Corr.1. 2019.
- [14] Committee for Medicinal Products for Human Use (CHMP). European public assessment report (EPAR): Glybera. EMA/882900/2011. 2012.
- [15] Committee for Medicinal Products for Human Use (CHMP). Withdrawal Assessment Report: Cerepro. EMEA/203243/2008 . 2009.
- [16] Committee for Medicinal Products for Human Use (CHMP). Withdrawal Assessment Report: Advexin. EMEA/692328/2008. 2009.

- [17] Committee for Medicinal Products for Human Use (CHMP). Withdrawal Assessment Report: Contusugene Ladenovec Gendux (CLG). EMEA/CHMP/453445/2009. 2009.
- [18] Committee for Medicinal Products for Human Use (CHMP). Withdrawal Assessment Report: Cerepro. 2011.
- [19] Committee for Medicinal Products for Human Use (CHMP). Withdrawal assessment Report: Oranera. EMA/250338/2013. 2013.
- [20] Committee for Medicinal Products for Human Use (CHMP). Withdrawal Assessment Report: Hyalograft C autograft. EMA/167433/2013. 2013.
- [21] Committee for Medicinal Products for Human Use (CHMP). European Public Assessment Report (EPAR) Heparesc. EMA/CHMP/746584/2015. 2015.
- [22] Committee for Medicinal Products for Human Use (CHMP). European public assessment report (EPAR): Simponi. EMEA/446762/2009. 2009.
- [23] Committee for Medicinal Products for Human Use (CHMP). European public assessment report (EPAR): Krystexxa. EMA/CHMP/697253/2012. 2012.
- [24] Committee for Medicinal Products for Human Use (CHMP). European public assessment report (EPAR): Kadcyła. EMA/749228/2013. 2013.
- [25] Committee for Medicinal Products for Human Use (CHMP). European public assessment report (EPAR): Kevzara. EMA/292840/2017. 2017.
- [26] Committee for Medicinal Products for Human Use (CHMP). European public assessment report (EPAR): Portrazza. EMA/CHMP/15391/2016. 2015.
- [27] Committee for Medicinal Products for Human Use (CHMP). European public assessment report (EPAR): Alprolix. EMA/CHMP/196953/2016. 2016.
- [28] Committee for Medicinal Products for Human Use (CHMP). European public assessment report (EPAR): Revestive. EMA/CHMP/525255/2012. 2012.
- [29] Committee for Medicinal Products for Human Use (CHMP). European public assessment report (EPAR): Besponsa. EMA/289046/2017. 2017.
- [30] Committee for Medicinal Products for Human Use (CHMP). European public assessment report (EPAR): Mylotarg. EMA/155284/2018. 2018.
- [31] Committee for Medicinal Products for Human Use (CHMP). European public assessment report (EPAR): Oxervate. EMA/351805/2017. 2017.
- [32] Committee for Medicinal Products for Human Use (CHMP). European public assessment report (EPAR): Adcetris. EMA/702390/2012. 2012.
- [33] Committee for Medicinal Products for Human Use (CHMP). European public assessment report (EPAR): Strensiq. EMA/CHMP/383178/2015. 2015.



- [34] Committee for Medicinal Products for Human Use (CHMP). Withdrawal Assessment Report: Theraloc. EMEA/67305/2009. 2009.
- [35] Committee for Medicinal Products for Human Use (CHMP). Withdrawal Assessment Report: Oncophage. EMA/CHMP/775076/2009. 2009.
- [36] Committee for Medicinal Products for Human Use (CHMP). Withdrawal Assessment Report: Zafiride. EMA/353057/2017. 2017.
- [37] Committee for Medicinal Products for Human Use (CHMP). Withdrawal Assessment Report: Plivensia. EMA/CHMP/576037/2017. 2017.
- [38] Committee for Medicinal Products for Human Use (CHMP). European public assessment report (EPAR): Elelyso. EMA/CHMP/399615/2012. 2012.
- [39] ICH. ICH Harmonised Tripartite Guideline Good Manufacturing Practice Guide for Active Pharmaceutical Ingredients Q7. 2000.
- [40] ICH. ICH Topic Q2 (R1) Validation of Analytical Procedures : Text and Methodology. ICH Harmon Tripart Guidel 2005.
- [41] Committee for Advanced Therapies (CAT); European medicines agency (EMA). Questions and answers , Comparability considerations for Advanced Therapy Medicinal Products (ATMP). 2019.
- [42] ICH. ICH Q5E : Comparability of Biotechnological / Biological Products Subject to Changes in Their Manufacturing Process ICH Q5E : Comparability of Biotechnological / Biological. Eur Med Agency 2003.
- [43] ICH. ICH Topic Q1A (R2) - Stability Testing of New Drug Substances and Products. ICH Harmon Tripart Guidel 2003.
- [44] ICH. Specifications: Test Procedures and acceptance criteria for biotechnological/ biological products Q6B. 1999.
- [45] European Medicines Agency (EMA). Good laboratory practice compliance n.d. <https://www.ema.europa.eu/en/human-regulatory/research-development/compliance/good-laboratory-practice-compliance>.
- [46] ICH. ICH S6 Preclinical Safety Evaluation of Biotechnology-Derived Pharmaceuticals. ICH Harmon. Tripart. Guidel., 2013, p. 215–42. [https://doi.org/10.1007/978-1-4614-5950-7\\_10](https://doi.org/10.1007/978-1-4614-5950-7_10).
- [47] ICH. Guideline for good clinical practice E6(R2). Eur Med Agency 2016.
- [48] ICH. ICH Topic E 8 General Considerations for Clinical Trials. Eur Med Agency 1998.
- [49] Committee for Medicinal Products for Human Use (CHMP). Guideline on strategies to identify and mitigate risks for first-in-human and early clinical trials with investigational medicinal products. Eur Med Agency 2017.
- [50] Committee for medicinal products for human use (CHMP). ICH guideline S6 (R1) – preclinical safety evaluation of biotechnology-derived pharmaceuticals. Eur Med Agency 2011.

- [51] Scmidt R. Dose-finding studies in clinical drug development. *Eur J Clin Pharmacol* 1988;34:15–9. <https://doi.org/10.1007/BF01061410>.
- [52] Higgins JP, Green S. *Cochrane Handbook for Systematic Reviews of Interventions*. Chichester, UK: John Wiley & Sons, Ltd; 2008. <https://doi.org/10.1002/9780470712184>.
- [53] Committee for Medicinal Products for Human Use (CHMP). Wording of therapeutic indication. Eur Med Agency 2019.
- [54] ICH. ICH Topic S 7 A Safety Pharmacology Studies for Human Pharmaceuticals. Eur Med Agency 2001.
